# Supplementary material for: Minute-scale incident mitigation in urban networks via threshold allocation and AI planning a three-stage corridor framework
Source: Research Square preprint supplement (doi:10.21203/rs.3.rs-8134835/v1), 2025-12-01
Supplement: Supplementary file 1 [file d882d8fb43c07eb50648dddb.docx]

**Supplementary Information**

*for the manuscript:*

**Minute-scale incident mitigation in urban networks via threshold allocation and AI planning: a three-stage corridor framework**

**Supplementary Table S1. Network sizes.**

Grid 20×20: nodes=400, edges=1520.

City-clip (OSM): nodes=144, edges=480.

**Supplementary Table S2. Parameter grid from paramsweep.yaml.**

|P|_participation_rate: 0.4, 0.6, 0.8; rho_intensity: 0.8, 1.0, 1.2; event_duration_s: 600, 1200, 1800; compliance_rate: 0.4, 0.6, 0.8

**Supplementary Note S1. Stage time budgets.**

H=60 s, M=60 s, P=120 s.

**Supplementary Data S1. Aggregated KPI file.**

We provide a long-format KPI table aggregated from nested `.../<network>/<demand>/<scenario>/kpi_agg.csv` files. See `kpi_agg_long.csv` packaged alongside this Supplementary Information.

**Supplementary Note S2. Baseline implementations (recap).**

PMFD: region-level gating tuned per testbed to maintain the MFD operating point. DRR: dynamic re-routing with elastic driver compliance (guidance only). SG: static gating with fixed entry metering; no compile-to-action planning.

Proposed: threshold allocation via water-filling over caps ci with a single level z; domain-independent planning with explicit timeouts under phase-compatibility and storage constraints.
